# Supplementary material
Source: PubMed Central journal article supplement (PMC31265)
Supplement: nar_29_7_1565__1.pdf [file nar_29_7_1565__1.pdf]

## SUPPLEMENTARY MATERIAL

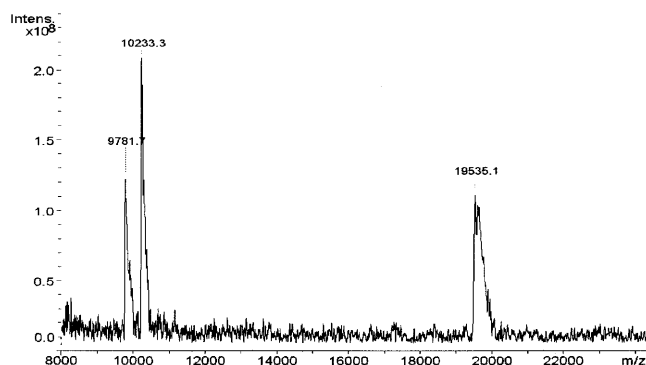

**Figure S1.** MALDI-TOF mass spectrum of the single-stranded 63 nt PCR product using pUC19 as template and the normal triphosphates dATP, dCTP, dGTP and dTTP. Full details of the experimental conditions of the PCR reaction and sample preparation for mass spectrometry are given in Materials and Methods.

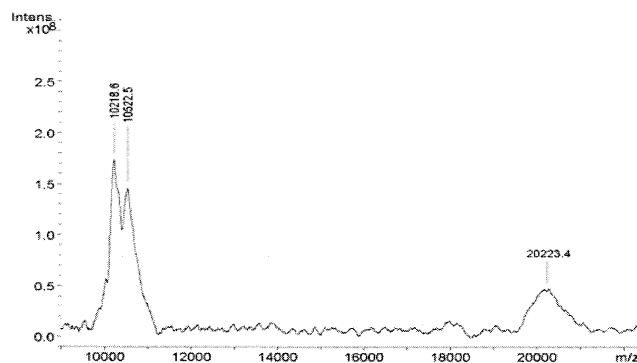

**Figure S2.** MALDI-TOF mass spectrum of the single-stranded amino-modified 63 nt PCR product derived from pUC19 using the normal triphosphates dATP, dCTP and dGTP and **5a**. Full details of the experimental conditions of the PCR reaction and sample preparation for mass spectrometry are given in Materials and Methods.

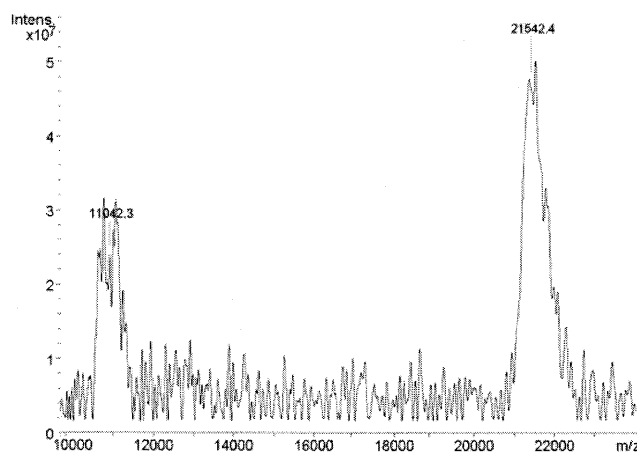

**Figure S3.** MALDI-TOF mass spectrum of the single-stranded imidazole-modified 62 nt PCR product derived from pUC19 using the normal triphosphates dATP, dCTP and dGTP and **5b**. Full details of the experimental conditions of the PCR reaction and sample preparation for mass spectrometry are given in Materials and Methods.
